# Supplementary figures and images for: Epsin deficiency impairs endocytosis by stalling the actin-dependent invagination of endocytic clathrin-coated pits
Source: eLife journal article supplement (doi:10.7554/elife.03311), 2014-08-13

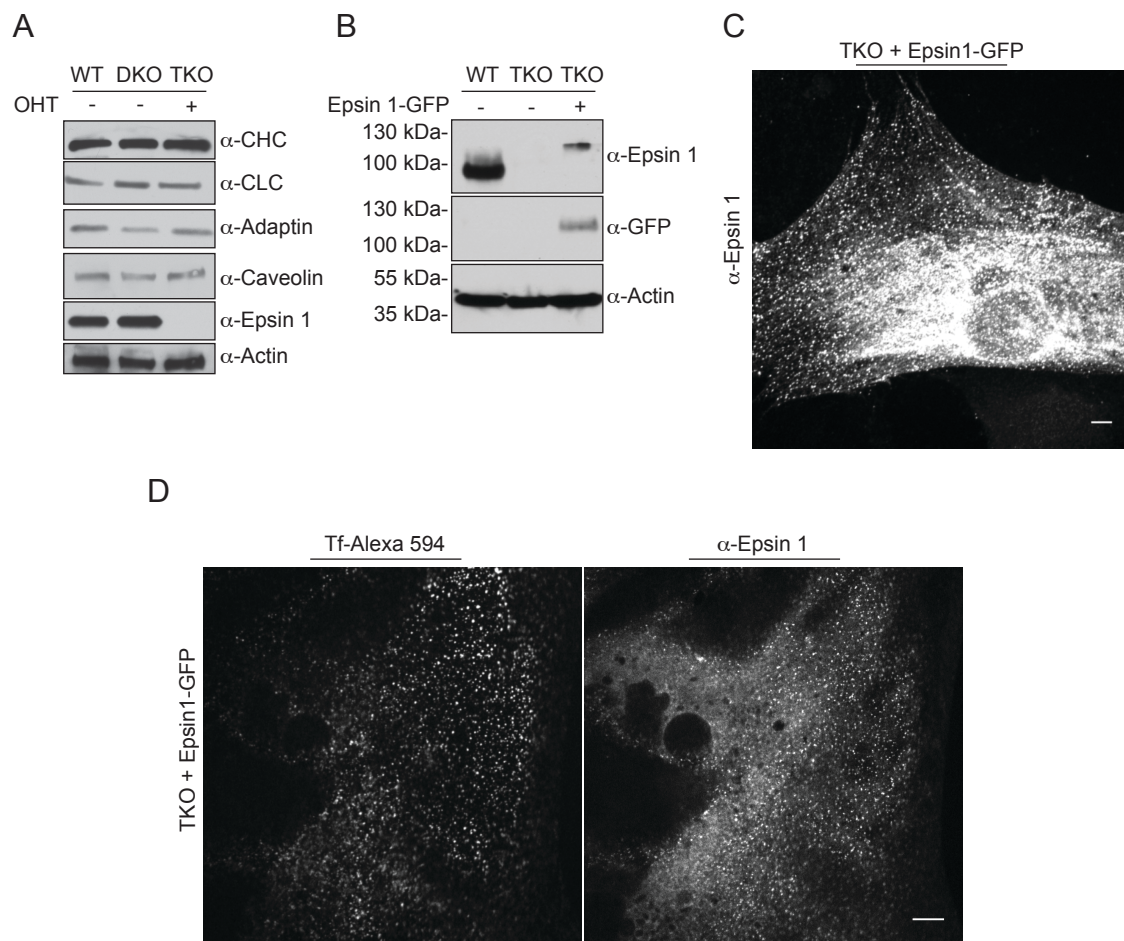

Fig.2 - Figure Supplement 1. Messa *et al.*

Supplement: supp [file elife-03311-supp-v1.zip]

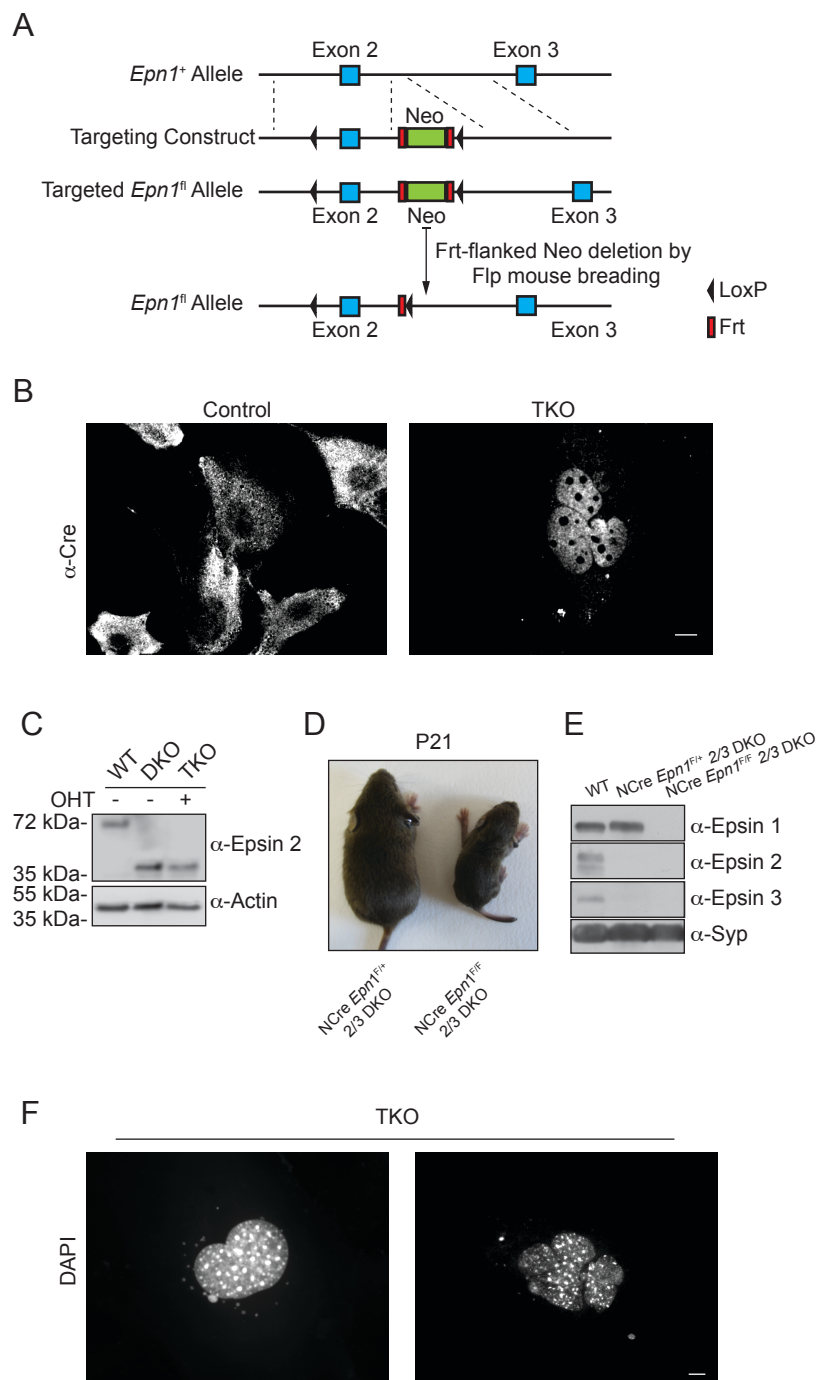

Fig.1 - Figure Supplement 1. Messa *et al.*

Supplement: supp [file elife-03311-supp-v1.zip]

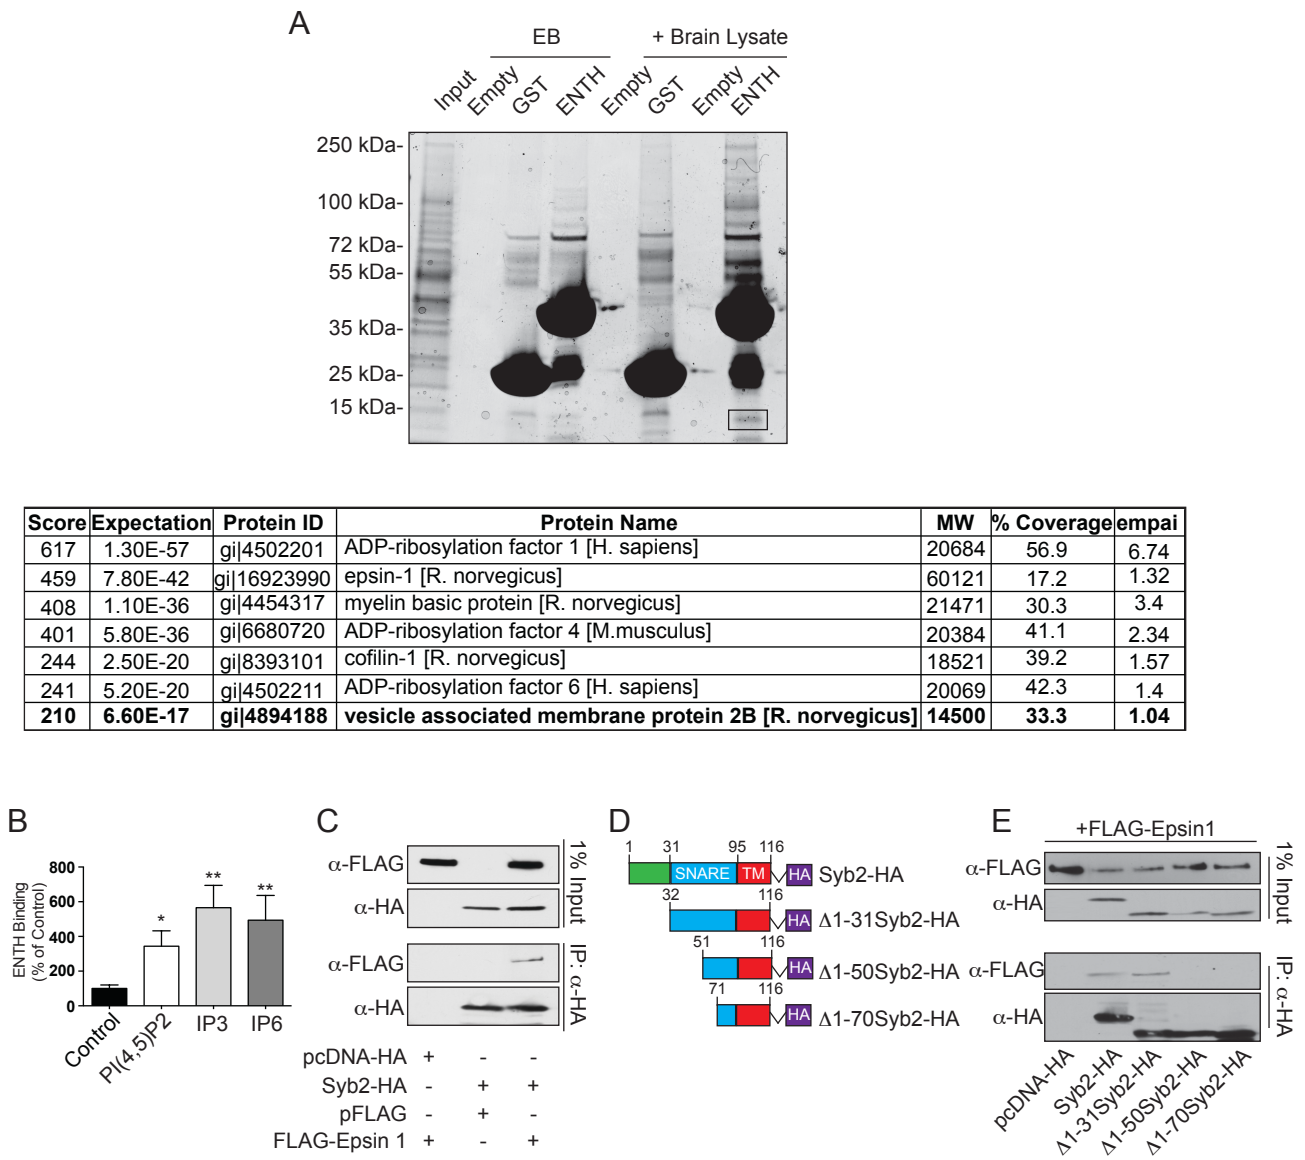

Fig.6 - Figure Supplement 1. Messa *et al.*

Supplement: supp [file elife-03311-supp-v1.zip]

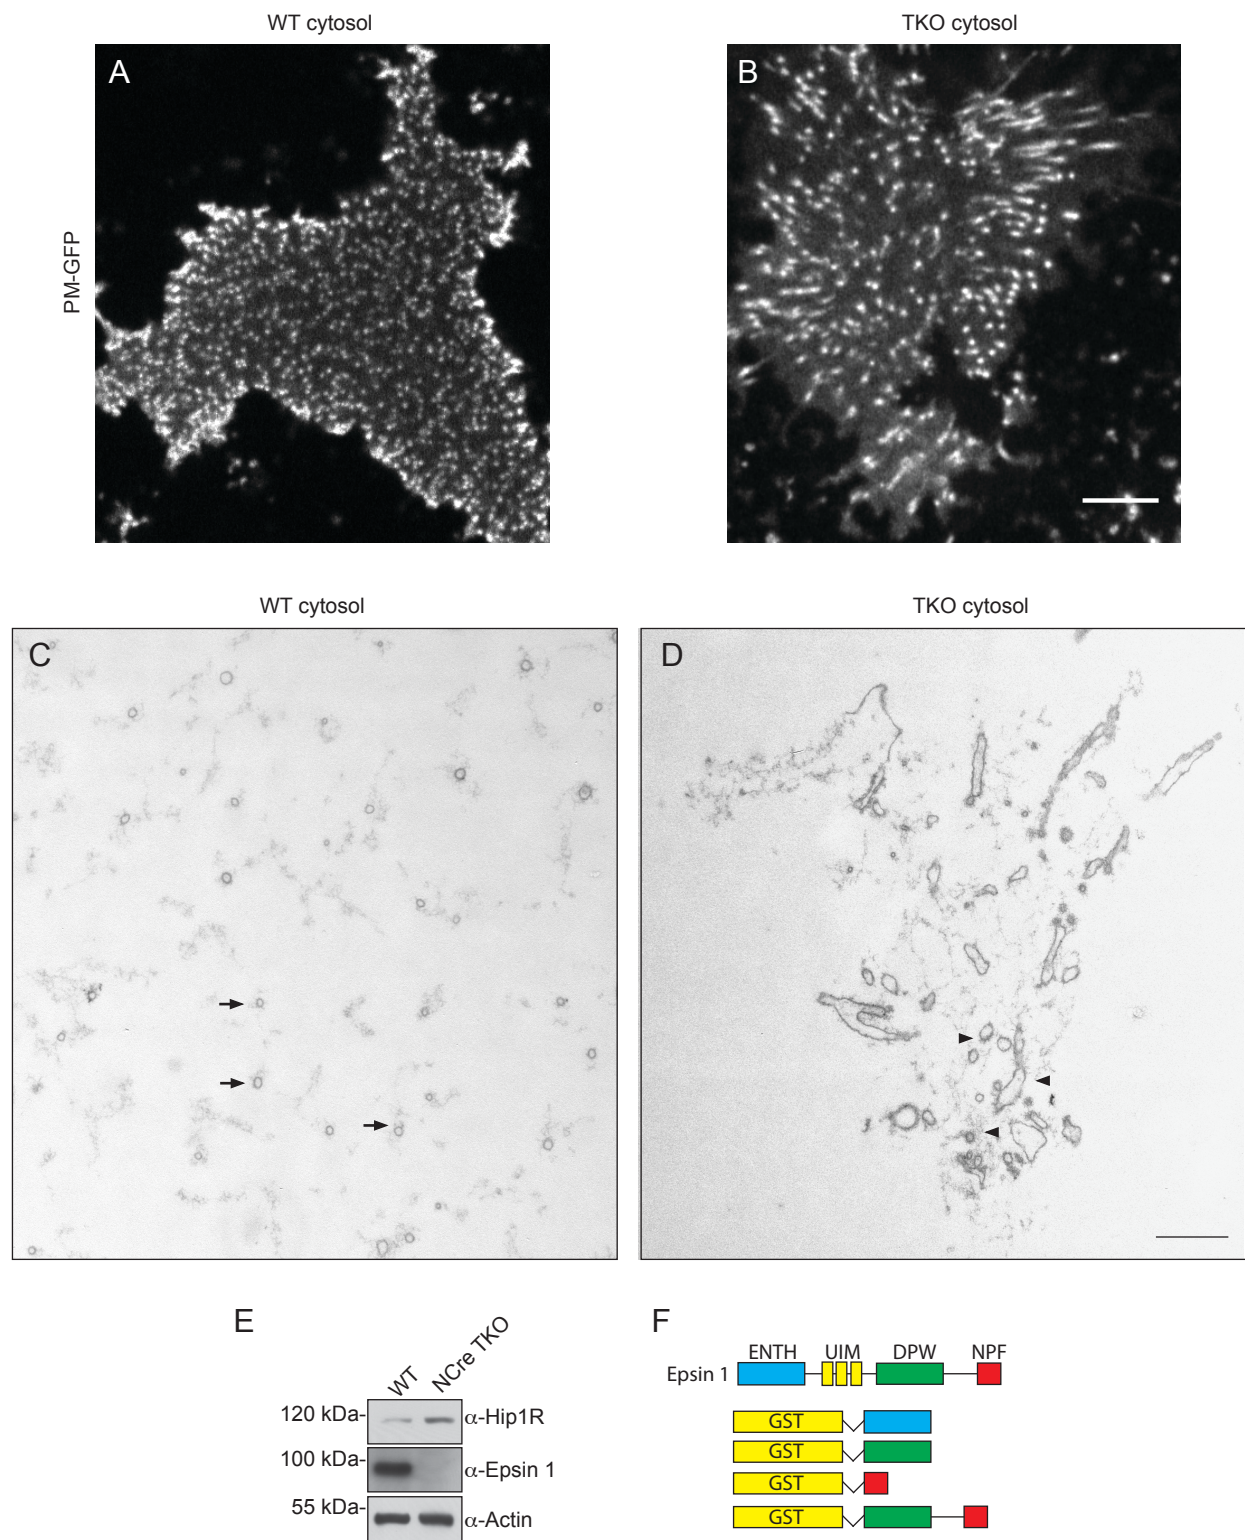

Fig.5 - Figure Supplement 1. Messa *et al.*

Supplement: supp [file elife-03311-supp-v1.zip]
